# Supplementary material for: Ni(ii)–N′NN′ pincer complexes catalyzed dehydrogenation of primary alcohols to carboxylic acids and H2accompanied by alcohol etherification
Source: Royal Society of Chemistry journal article supplement (doi:10.1039/c7cy00432j), 2017-01-01

**Ni(II)-N'NN' Pincer Complexes Catalyzed Dehydrogenation of  
Primary Alcohols to Carboxylic acids and H<sub>2</sub> Accompanied by the  
Alcohol Etherification**

Zengjin Dai, Qin Luo, Huan Jiang, Qi Luo, Hua Li, Jing Zhang\* and Tianyou Peng\*

College of Chemistry and Molecular Science, Wuhan University, Wuhan 430072, P. R. China

E-mail addresses: jzhang03@whu.edu.cn (J. Zhang), typeng@whu.edu.cn (T. Peng)

**Supporting Information**

**Table of Contents**

|                                                                                                                          |          |
|--------------------------------------------------------------------------------------------------------------------------|----------|
| <b>Solvent screening for acceptorless dehydrogenation of benzyl alcohol to benzoic acid catalyzed by complex 1 .....</b> | <b>2</b> |
| <b>The H<sub>2</sub> detection and production.....</b>                                                                   | <b>2</b> |
| <b>Analysis of products in organic phase by using 4-methylbenzyl alcohol as the substrate.....</b>                       | <b>4</b> |

## Solvent screening for acceptorless dehydrogenation of benzyl alcohol to benzoic acid catalyzed by complex 1

To an oven-dried 25 mL schlenk tube, benzyl alcohol (0.54 g, 5 mmol), CsOH·H<sub>2</sub>O (5 mmol, 0.84 g) and complex **1** (25 μmol, 11.0 mg) were charged with 1 mL solvent, and the solution was heated at 150°C (oil bath) under argon atmosphere for 24 h. After cooling to room temperature, degassed water (5 mL) was added and the mixture was extracted with diethyl ether (3 × 5 mL). The aqueous phase was acidified with 6M HCl and extracted with ethyl acetate (3 × 10 mL). The combined ethyl acetate solution were washed with brine (15 mL), dried over anhydrous Na<sub>2</sub>SO<sub>4</sub>, and evaporated to dryness under reduced pressure, the white solid of the pure benzoic acid was obtained and weighted for calculating the yield. Yield = n(benzoic acid)/n(CsOH).

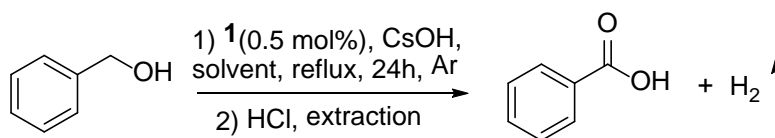

| Entry | Solvent          | Yield (%) |
|-------|------------------|-----------|
| 1     | Toluene          | 6         |
| 2     | 1,4-dioxane      | 5         |
| 3     | H <sub>2</sub> O | Trace     |
| 4     | Benzyl alcohol   | 10        |

## The H<sub>2</sub> detection and production

Under an argon atmosphere, benzyl alcohol (2.16 g, 20 mmol), sodium benzyloxide (5 mmol, 0.65 g) and complex **3** (19.0 mg, 50 μmol) were added to a 25 mL schlenk tube which is connected to a 1000 mL distillation collection ball with one neck sealed by a rubber septum. Then the reaction mixture was heated at 150°C (oil bath). The inner gas was taken out by a 100 μL micro-injector after 6 h, and sent to GC for analysis, hydrogen gas was determined by comparing to the standard sample.

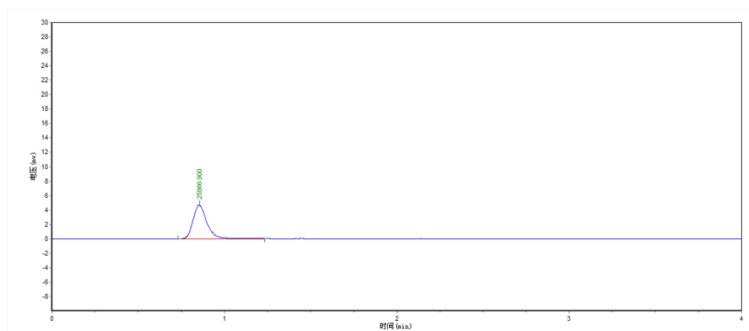

GC spectrum of the produced gas

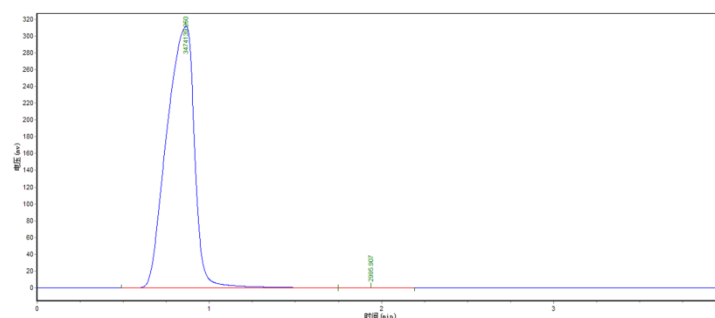

GC spectrum of standard hydrogen gas

## The H<sub>2</sub> gas collection

Under an argon atmosphere, benzyl alcohol (10.8 g, 100 mmol, excess), sodium benzyloxide (1.30 g, 10 mmol), and complex **1** (0.11 g, 0.25 mmol, 2.5 mol%) were added to a 100 mL schlenk tube which is connected with a gas collection instrument through gravity drainage method. The reaction mixture was heated at 150°C (oil bath) and the volume of produced gas was recorded in the due time. A blank experiment without catalyst was taken at the same condition. The standard atmospheric pressure  $P=101.325$  kPa; room temperature  $T=291.15$  K; the corresponding water saturated vapor pressure under the temperature  $P_0=2.0644$  kPa. The amount of H<sub>2</sub> was calculated by Van der Waals equation:  $(P-P_0)V=nRT$  ( $R=8.314$  kPa·L·mol<sup>-1</sup>·K<sup>-1</sup>).

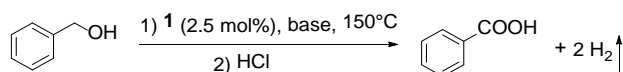

| time (h) | V (H <sub>2</sub> ) (mL) | n(H <sub>2</sub> ) (mmol) |
|----------|--------------------------|---------------------------|
| 2        | 27                       | 1.11                      |
| 3        | 42                       | 1.72                      |

---

|   |     |      |
|---|-----|------|
| 4 | 70  | 2.87 |
| 5 | 94  | 3.86 |
| 6 | 98  | 4.02 |
| 7 | 105 | 4.31 |
| 8 | 105 | 4.31 |
| 9 | 111 | 4.55 |

---

After the H<sub>2</sub> collection experiment, the reaction mixture was treated with extraction operation, which afforded 0.24 g pure benzoic acid (1.96 mmol).  $n(\text{H}_2)/n(\text{benzoic acid}) \approx 2:1$ .

### **Analysis of products in organic phase using 4-methylbenzyl alcohol as the substrate**

4-Methylbenzyl alcohol (2.44 g, 20 mmol), sodium 4-methylbenzyloxy (0.72 g, 5.0 mmol) and complex **3** (19.0 mg, 50  $\mu\text{mol}$ ) were charged in a 25 mL schlenk tube, and the reaction mixture was heated at 150°C for 48 h under the argon atmosphere. After cooling to room temperature, degassed water (10 mL) was added and the mixture was extracted with diethyl ether (3  $\times$  10 mL). The aqueous phase was acidified with 6M HCl and extracted with ethyl acetate (5  $\times$  20 mL). The combined ethyl acetate solution were washed with brine (25 mL), dried over anhydrous Na<sub>2</sub>SO<sub>4</sub>, and evaporated to dryness under reduced pressure, in which the pure 4-methylbenzoic acid (0.47g, 69%) was obtained. The products in organic phase were separated by column chromatography using silica gel (elute: petroleum ether/ethyl acetate 40/1 (V/V)). The products were characterized by NMR analysis (relaxation time d1=20 s) with standard samples and weighted for calculating the yields.

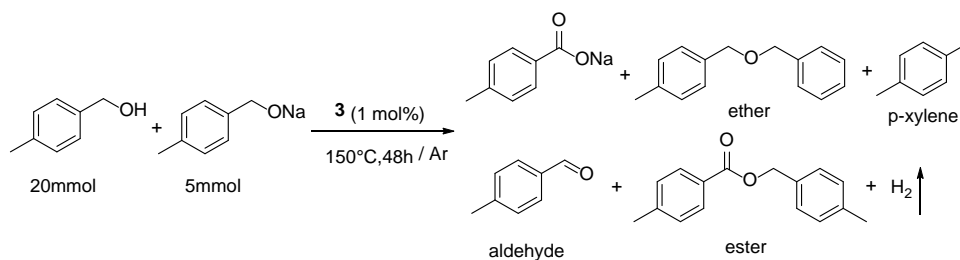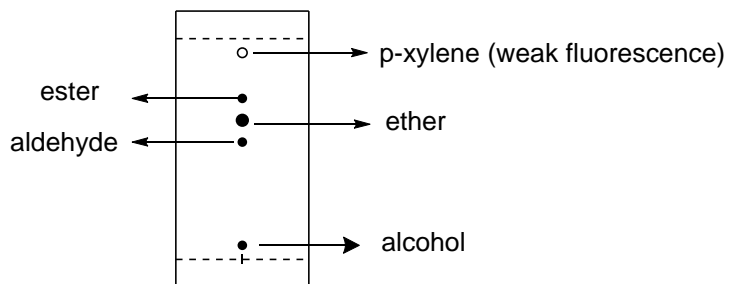

TLC analysis of products in organic phase

P-xylene was obtained as a colorless oil weighted 0.11 g (1.03 mmol);

Ester, ether, aldehyde were collected as mixtures.

1) Mixture of ether and trace amount of ester, weighted 0.09 g (deuterated solvent:  $\text{CDCl}_3$ );

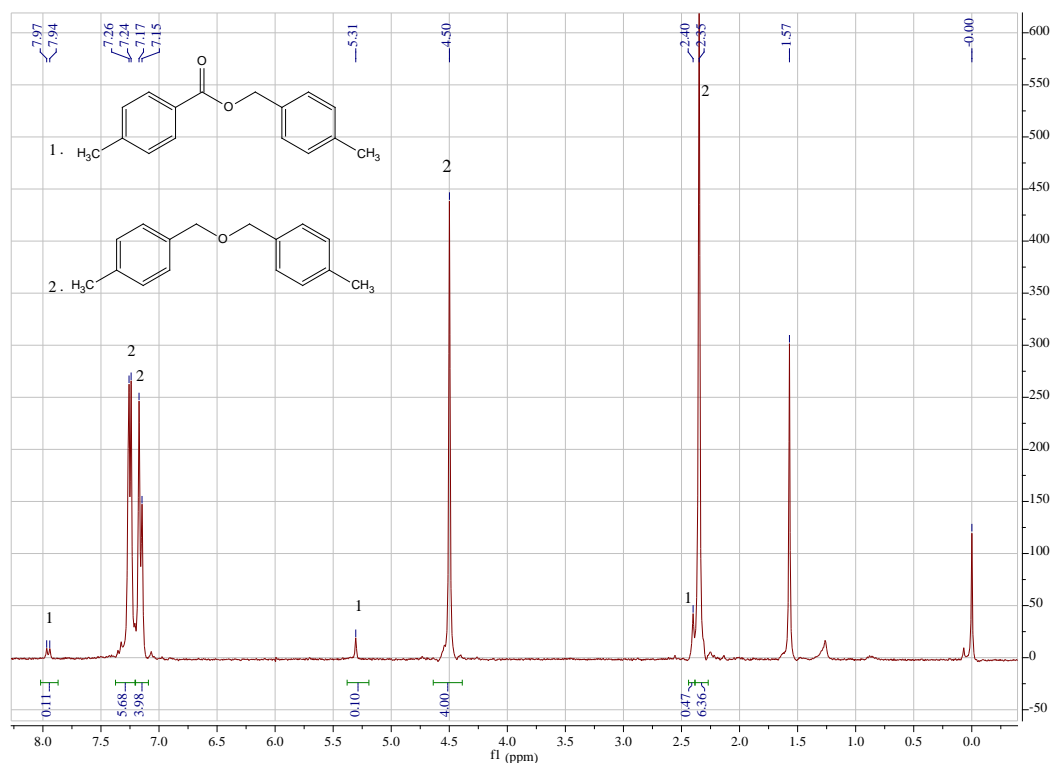

2) Mixture of ether and aldehyde, weighted 0.37 g (deuterated solvent:  $\text{CDCl}_3$ );

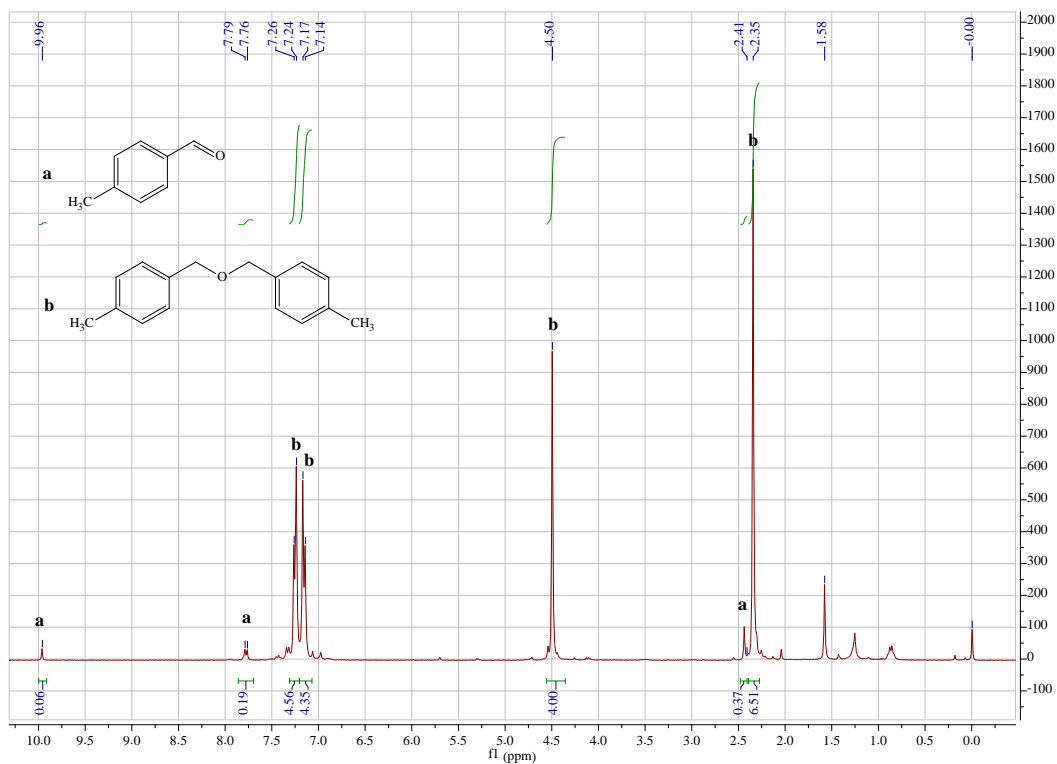

3) Mixture of ether and aldehyde, weighted 0.16 g (deuterated solvent: CDCl<sub>3</sub>).

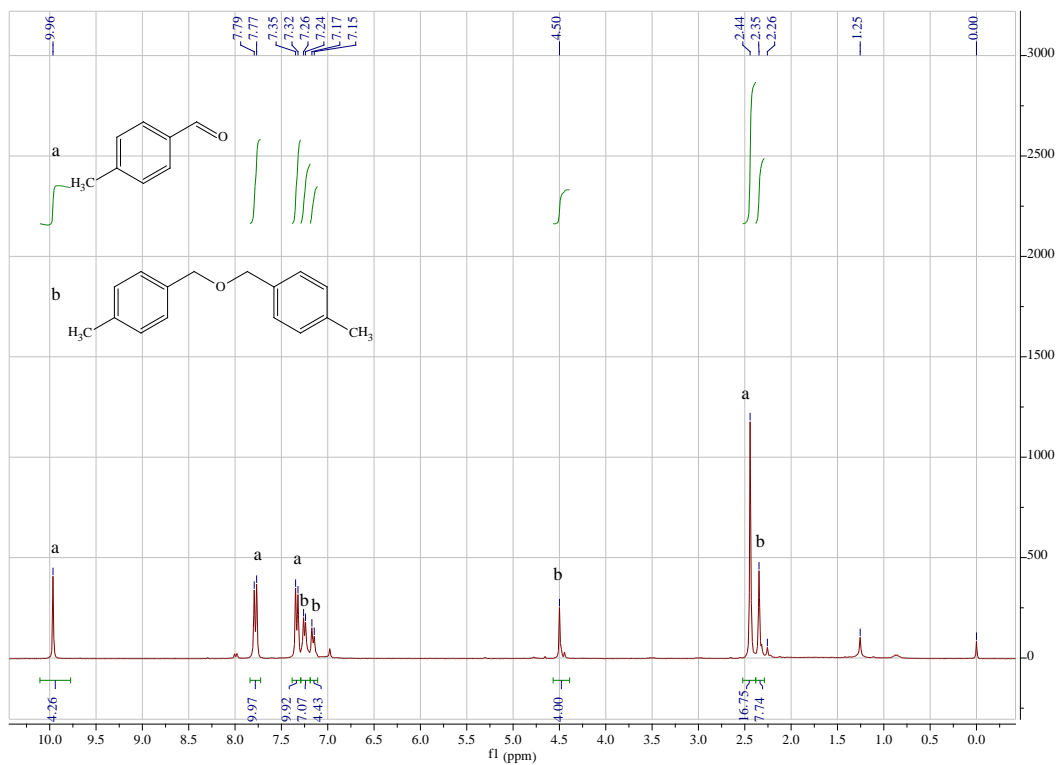

The amounts of products were listed below according to the calculation:

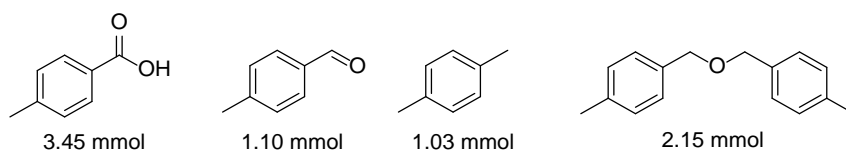

Supplement: c7cy00432j1.pdf [file c7cy00432j1.pdf]
